# Supplementary material
Source: PubMed Central journal article supplement (PMC5181632)
Supplement: supp_ddw104_SuppData.pdf [file supp_ddw104_SuppData.pdf]

## Supplementary Data

**Supplementary Table 1. Numbers of cases, controls, and trios by recruitment site.**

| Continental Group                                     | Site          | Cleft Lip with or without Cleft Palate |            |             |
|-------------------------------------------------------|---------------|----------------------------------------|------------|-------------|
|                                                       |               | Controls                               | Cases      | Trios       |
| <b>European</b>                                       | Denmark       | 0                                      | 18         | 28          |
|                                                       | Hungary       | 253                                    | 23         | 82          |
|                                                       | Spain         | 0                                      | 2          | 31          |
|                                                       | Turkey        | 171                                    | 57         | 115         |
|                                                       | United States | 411                                    | 70         | 150         |
|                                                       | <b>TOTAL</b>  | <b>835</b>                             | <b>170</b> | <b>406</b>  |
| <b>Central/South American</b>                         | Argentina     | 30                                     | 68         | 43          |
|                                                       | Colombia      | 277                                    | 276        | 405         |
|                                                       | Guatemala     | 208                                    | 47         | 55          |
|                                                       | Puerto Rico   | 106                                    | 33         | 51          |
|                                                       | United States | 5                                      | 25         | 47          |
|                                                       | <b>TOTAL</b>  | <b>626</b>                             | <b>449</b> | <b>601</b>  |
| <b>Asian</b>                                          | China         | 27                                     | 32         | 125         |
|                                                       | India         | 38                                     | 19         | 32          |
|                                                       | Philippines   | 96                                     | 32         | 127         |
|                                                       | <b>TOTAL</b>  | <b>161</b>                             | <b>83</b>  | <b>284</b>  |
| <b>African</b>                                        | Ethiopia      | 0                                      | 80         | 3           |
|                                                       | Nigeria       | 68                                     | 34         | 16          |
|                                                       | United States | 5                                      | 7          | 7           |
|                                                       | Hungary       | 1                                      | 0          | 0           |
|                                                       | <b>TOTAL</b>  | <b>74</b>                              | <b>121</b> | <b>26</b>   |
| <b>No subgroup (included in multiethnic analysis)</b> |               | <b>4</b>                               |            | <b>2</b>    |
| <b>GRAND TOTAL</b>                                    |               | <b>1700</b>                            | <b>823</b> | <b>1319</b> |

**Supplementary Table 2.** Summary of the SNP filters recommended by the GCC. The number and percentage of SNPs removed is indicated for each filter individually. The number and percentage of SNPs retained is shown for the filters cumulatively applied in sequential order down the rows of the table.

| Filter                                                                                           | SNPs filtered |         | Cumulative SNPs Retained |         |
|--------------------------------------------------------------------------------------------------|---------------|---------|--------------------------|---------|
|                                                                                                  | number        | percent | number                   | percent |
| none (all SNP probes)                                                                            |               |         | 557,677                  | 100.00% |
| CIDR technical filters                                                                           | 9,625         | 1.73%   | 548,052                  | 98.27%  |
| missing call rate greater than 2%                                                                | 5,891         | 1.06%   | 542,161                  | 97.22%  |
| 2 or more discordant call in 264 study duplicates                                                | 42            | 0.01%   | 542,119                  | 97.22%  |
| 20 or more Mendelian errors in 5,288 parent-offspring trios or dyads                             | 2,410         | 0.43%   | 539,709                  | 96.78%  |
| HWE p-value < 0.0001 in participants of genetically confirmed European ancestry                  | 194           | 0.03%   | 539,515                  | 96.74%  |
| sex differences in allele frequency of 0.2 or greater for autosomes or XY pseudoautosomal region | 42            | 0.01%   | 539,473                  | 96.74%  |
| sex differences in heterozygosity of 0.3 or greater for autosomes or XY pseudoautosomal region   | 0             | 0.00%   | 539,473                  | 96.74%  |
| positional duplicates                                                                            | 7,278         | 1.31%   | 532,195                  | 95.43%  |
| MAF = 0                                                                                          | 76,746        | 13.76%  | 455,449                  | 81.67%  |
| MAF < 0.01                                                                                       | 161,816       | 29.02%  | 293,633                  | 52.65%  |

**Supplementary Table 3. Population-based case-control cohorts used for replication**

|                                                 | <b>CL</b>  | <b>CLP</b> | <b>Controls</b> | <b>TOTAL</b> |
|-------------------------------------------------|------------|------------|-----------------|--------------|
| <b>United States</b>                            |            |            |                 |              |
| <i>Iowa Case-Control Study</i>                  | 25         | 45         | 146             | 216          |
| <i>Utah Child and Family Health Study</i>       | 42         | 59         | 220             | 321          |
| <b>Norway</b>                                   |            |            |                 |              |
| Norwegian Mother and Child Cohort               | 17         | 57         | 354             | 428          |
| Norway Facial Clefts Study                      | 117        | 178        | 455             | 750          |
| <b>Denmark</b> ( <i>National Birth Cohort</i> ) | 31         | 36         | 510             | 577          |
| <b>TOTAL</b>                                    | <b>232</b> | <b>375</b> | <b>1685</b>     | <b>2292</b>  |



**Supplementary Table 8. Association results for previous reported CL/P GWAS loci**

| Locus | Gene     | SNP        | Population            | P-value previous SNP | Best SNP in locus* | Best p-value in locus* |
|-------|----------|------------|-----------------------|----------------------|--------------------|------------------------|
| 1p36  | PAX7     | rs742071   | All Populations       | 6.80E-09             | rs4920524          | 3.72E-09               |
|       |          |            | Europeans             | 9.16E-07             | rs9439714          | 1.91E-07               |
|       |          |            | Asians                | 3.95E-01             | rs12402156         | 9.27E-04               |
|       |          |            | Latin/South Americans | 9.27E-04             | rs6658147          | 1.25E-04               |
| 1p22  | ARHGAP29 | rs560426   | All Populations       | 5.37E-05             | rs4147882          | 5.59E-11               |
|       |          |            | Europeans             | 4.98E-01             | rs12088309         | 3.63E-05               |
|       |          |            | Asians                | 1.58E-02             | rs3789431          | 1.53E-05               |
|       |          |            | Latin/South Americans | 3.39E-04             | rs4147882          | 3.99E-07               |
| 1q32  | IRF6     | rs861020   | All Populations       | 1.75E-08             | rs11119345         | 2.52E-17               |
|       |          |            | Europeans             | 5.96E-02             | rs56057644         | 2.92E-02               |
|       |          |            | Asians                | 2.35E-06             | rs1044516          | 1.01E-06               |
|       |          |            | Latin/South Americans | 6.94E-04             | rs11119345         | 3.40E-13               |
| 1q32  | IRF6     | rs642961   | All Populations       | 4.02E-09             | -                  | -                      |
|       |          |            | Europeans             | 4.66E-02             | -                  | -                      |
|       |          |            | Asians                | 2.16E-06             | -                  | -                      |
|       |          |            | Latin/South Americans | 2.50E-04             | -                  | -                      |
| 2p21  | THADA    | rs7590268  | All Populations       | 9.23E-03             | rs10196106         | 2.98E-04               |
|       |          |            | Europeans             | 3.95E-01             | rs67905560         | 3.22E-03               |
|       |          |            | Asians                | 6.24E-01             | rs72613898         | 2.92E-02               |
|       |          |            | Latin/South Americans | 2.98E-03             | rs7604544          | 6.46E-04               |
| 3p11  | EPHA3    | rs7632427  | All Populations       | 1.66E-02             | 3:89544366:C:T     | 3.90E-04               |
|       |          |            | Europeans             | 4.94E-02             | rs9865804          | 3.67E-03               |
|       |          |            | Asians                | 3.94E-01             | rs199821294        | 1.01E-02               |
|       |          |            | Latin/South Americans | 1.58E-01             | 3:89544366:C:T     | 5.30E-04               |
| 8q21  | DCAF4L2  | rs12543318 | All Populations       | 2.11E-07             | same               | same                   |
|       |          |            | Europeans             | 1.41E-05             | same               | same                   |
|       |          |            | Asians                | 9.74E-01             | rs4961067          | 1.57E-02               |
|       |          |            | Latin/South Americans | 2.84E-05             | rs16875013         | 7.09E-06               |
| 8q24  | --       | rs987525   | All Populations       | 6.58E-14             | rs55658222         | 5.63E-30               |
|       |          |            | Europeans             | 1.47E-13             | rs72728734         | 7.33E-15               |
|       |          |            | Asians                | 8.00E-01             | rs112704402        | 3.74E-03               |
|       |          |            | Latin/South Americans | 3.13E-06             | rs55658222         | 3.98E-14               |
| 10q25 | VAX1     | rs7078160  | All Populations       | 3.68E-06             | rs10886040         | 7.19E-07               |
|       |          |            | Europeans             | 5.73E-03             | rs201128098        | 9.04E-04               |
|       |          |            | Asians                | 7.37E-05             | rs7072663          | 1.21E-05               |
|       |          |            | Latin/South Americans | 6.31E-02             | rs113339720        | 2.81E-02               |
| 13q31 | SPRY2    | rs8001641  | All Populations       | 1.06E-05             | rs11841646         | 7.44E-07               |
|       |          |            | Europeans             | 4.10E-02             | rs11345095         | 1.66E-03               |
|       |          |            | Asians                | 6.00E-03             | rs1854110          | 5.10E-04               |
|       |          |            | Latin/South Americans | 1.27E-03             | rs17072219         | 1.50E-04               |
| 16p13 | CRBBP    | rs8049367  | All Populations       | 3.24E-02             | rs2526687          | 1.35E-04               |
|       |          |            | Europeans             | 2.58E-01             | rs137967419        | 1.84E-05               |
|       |          |            | Asians                | 3.70E-01             | rs146255910        | 1.76E-03               |
|       |          |            | Latin/South Americans | 2.44E-01             | rs11076796         | 7.11E-04               |

|       |      |            |                       |          |            |          |
|-------|------|------------|-----------------------|----------|------------|----------|
| 17p13 | NTN1 | rs9788972  | All Populations       | 1.42E-07 | rs11273201 | 7.84E-12 |
|       |      |            | Europeans             | 6.26E-03 | rs7406226  | 2.16E-07 |
|       |      |            | Asians                | 2.66E-02 | rs1880646  | 1.29E-04 |
|       |      |            | Latin/South Americans | 1.10E-05 | rs7406226  | 1.46E-08 |
| 17p13 | NTN1 | rs4791774  | All Populations       | 1.21E-04 | -          | -        |
|       |      |            | Europeans             | 1.66E-02 | -          | -        |
|       |      |            | Asians                | 7.80E-02 | -          | -        |
|       |      |            | Latin/South Americans | 5.50E-03 | -          | -        |
| 17q22 | NOG  | rs227731   | All Populations       | 9.77E-07 | -          | -        |
|       |      |            | Europeans             | 6.06E-02 | -          | -        |
|       |      |            | Asians                | 3.89E-01 | -          | -        |
|       |      |            | Latin/South Americans | 8.56E-07 | -          | -        |
| 17q22 | NOG  | rs227727   | All Populations       | 9.28E-07 | same       | same     |
|       |      |            | Europeans             | 5.20E-02 | rs78717626 | 8.53E-03 |
|       |      |            | Asians                | 3.63E-01 | rs62074819 | 9.76E-03 |
|       |      |            | Latin/South Americans | 5.73E-07 | same       | same     |
| 20q12 | MAFB | rs13041247 | All Populations       | 4.23E-04 | rs6016399  | 8.61E-07 |
|       |      |            | Europeans             | 2.31E-01 | rs11698990 | 1.19E-02 |
|       |      |            | Asians                | 1.04E-01 | rs6102085  | 1.05E-05 |
|       |      |            | Latin/South Americans | 9.07E-04 | rs4810299  | 3.25E-05 |

\* locus defined by +/- 100kb region around previously reported SNP

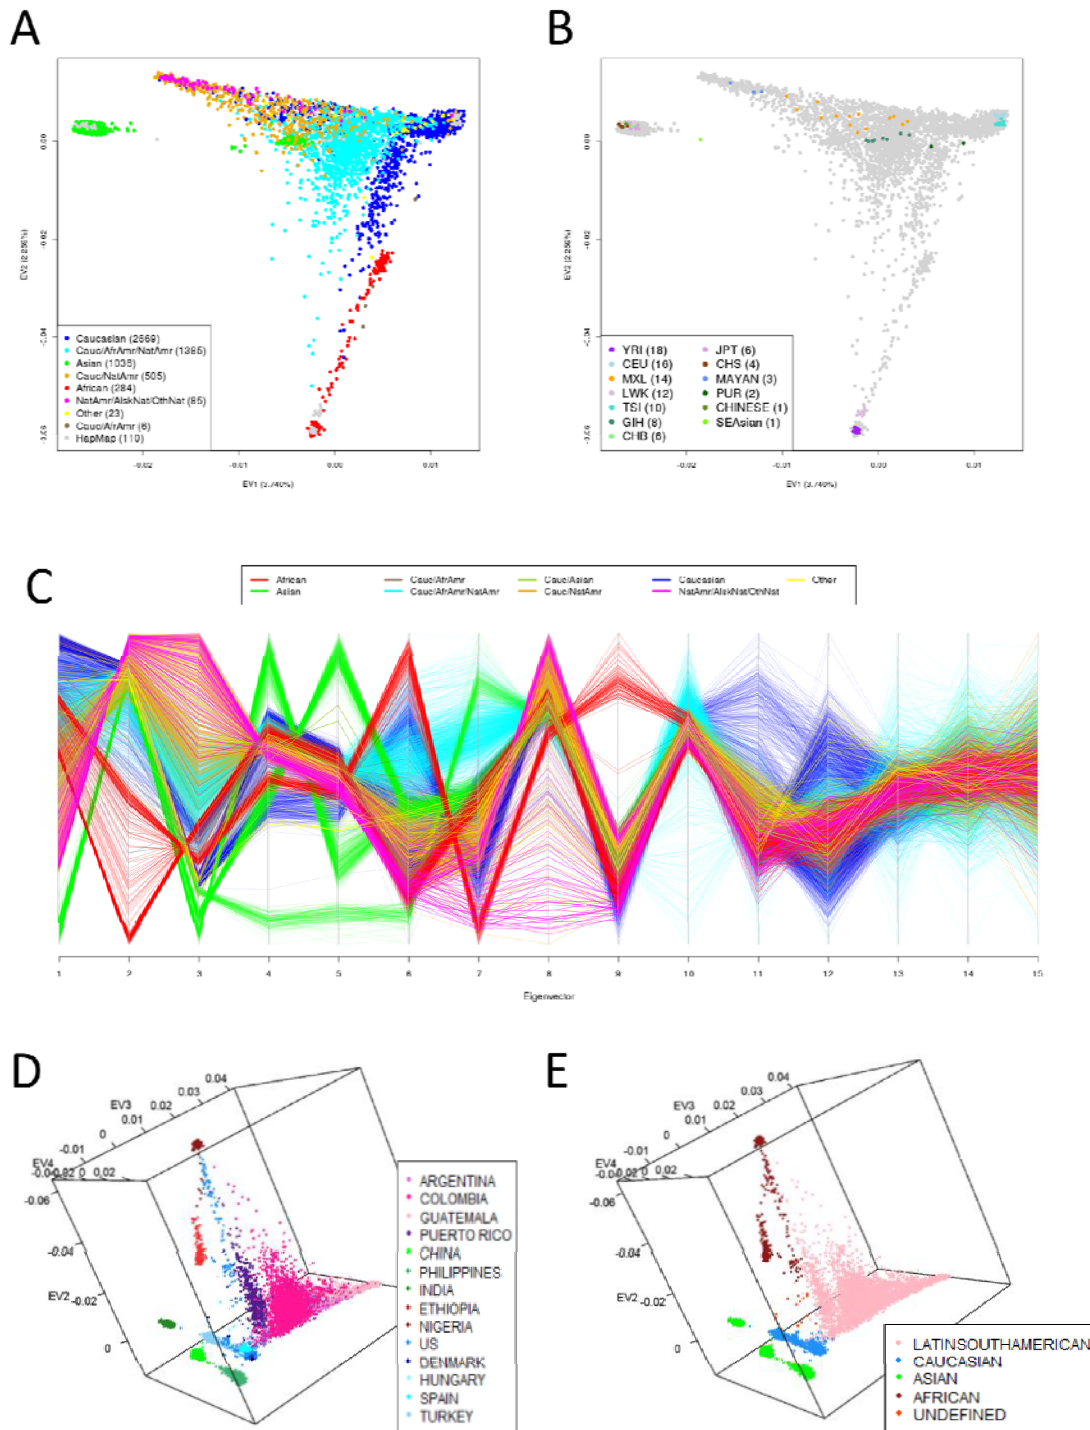

**Supplementary Figure 1. Population structure in the sample.** The first and second PCA eigenvectors, colored by (A) participant self-reported ancestry, and (B) HapMap control recruitment site, show the customary triangular pattern of ancestry with vertices comprising African, Asian, and European continental groups. (C) Parallel coordinate graph depicting scaled PCA eigenvectors 1-15 colored by self-reported ancestry shows many dimensions of population structure are represented in the sample. PCA eigenvectors 2-4 colored by (D) recruitment site, and (E) four genetic analysis groups, shows that the sample can be partitioned into ancestry groups, and that substantial population structure exists within each of these groups.

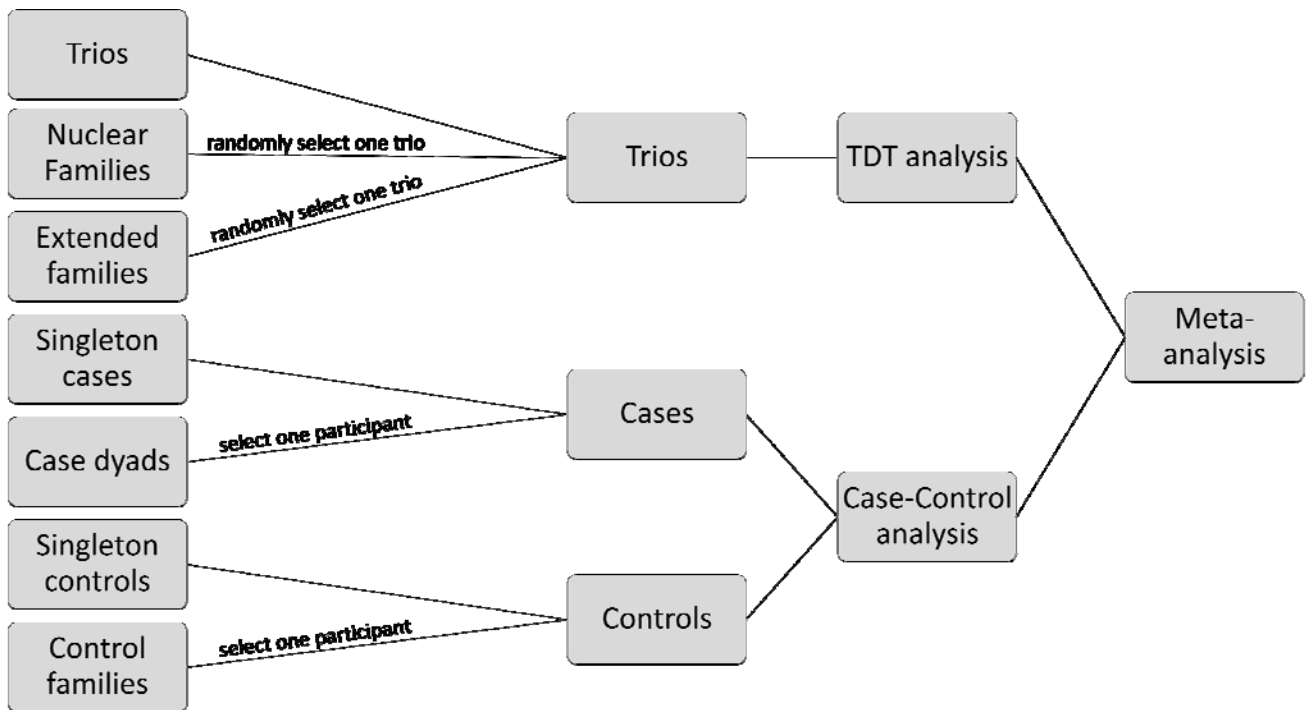

**Supplementary Figure 2. Flowchart showing the partitioning of the total sample into analysis sets.** The transmission disequilibrium test (TDT) analysis set comprised case-parent trios either recruited as trios or randomly selected from nuclear or extended families. The case-control analysis set comprised unrelated cases either recruited as singletons or chosen from case dyads and unrelated controls either recruited as singletons or chosen from control families. TDT and case-control results were combined via weighted odds ratio meta-analysis to generate study-wide association results.

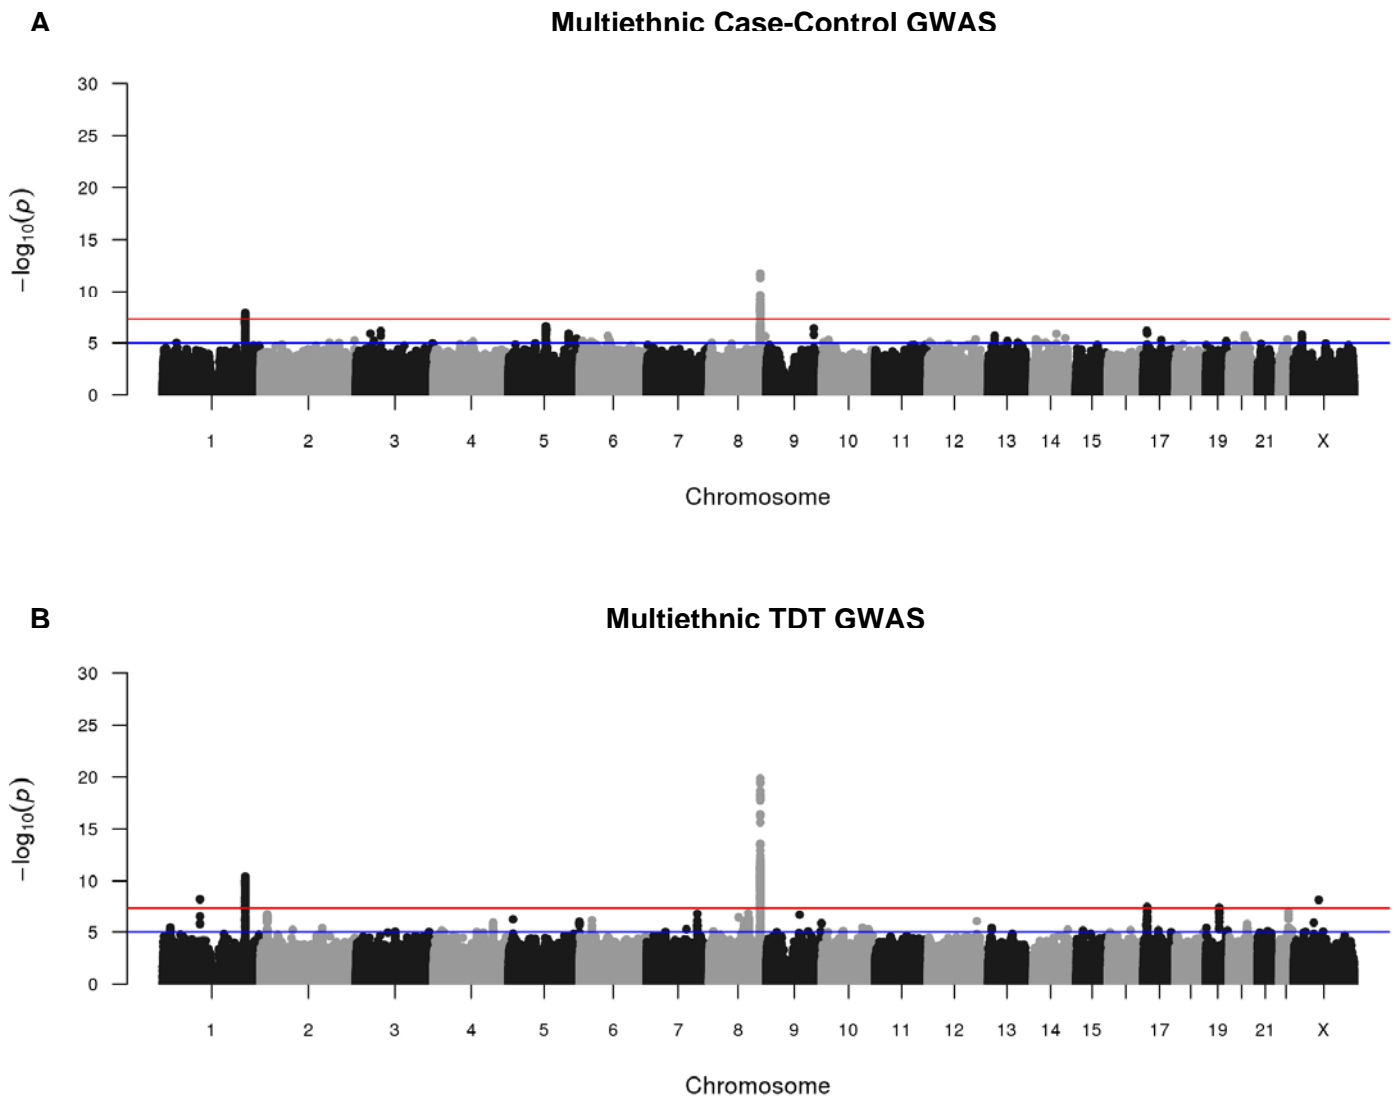

**Supplementary Figure 3. Manhattan plots for case-control and TDT analyses in multiethnic sample.** (A) Results for logistic regression analysis using 18 PCs of ancestry. Genomic inflation factor,  $\lambda$ , was 1.043. (B) Results for TDT analysis. Genomic inflation factor ( $\lambda$ ) was 1.068.

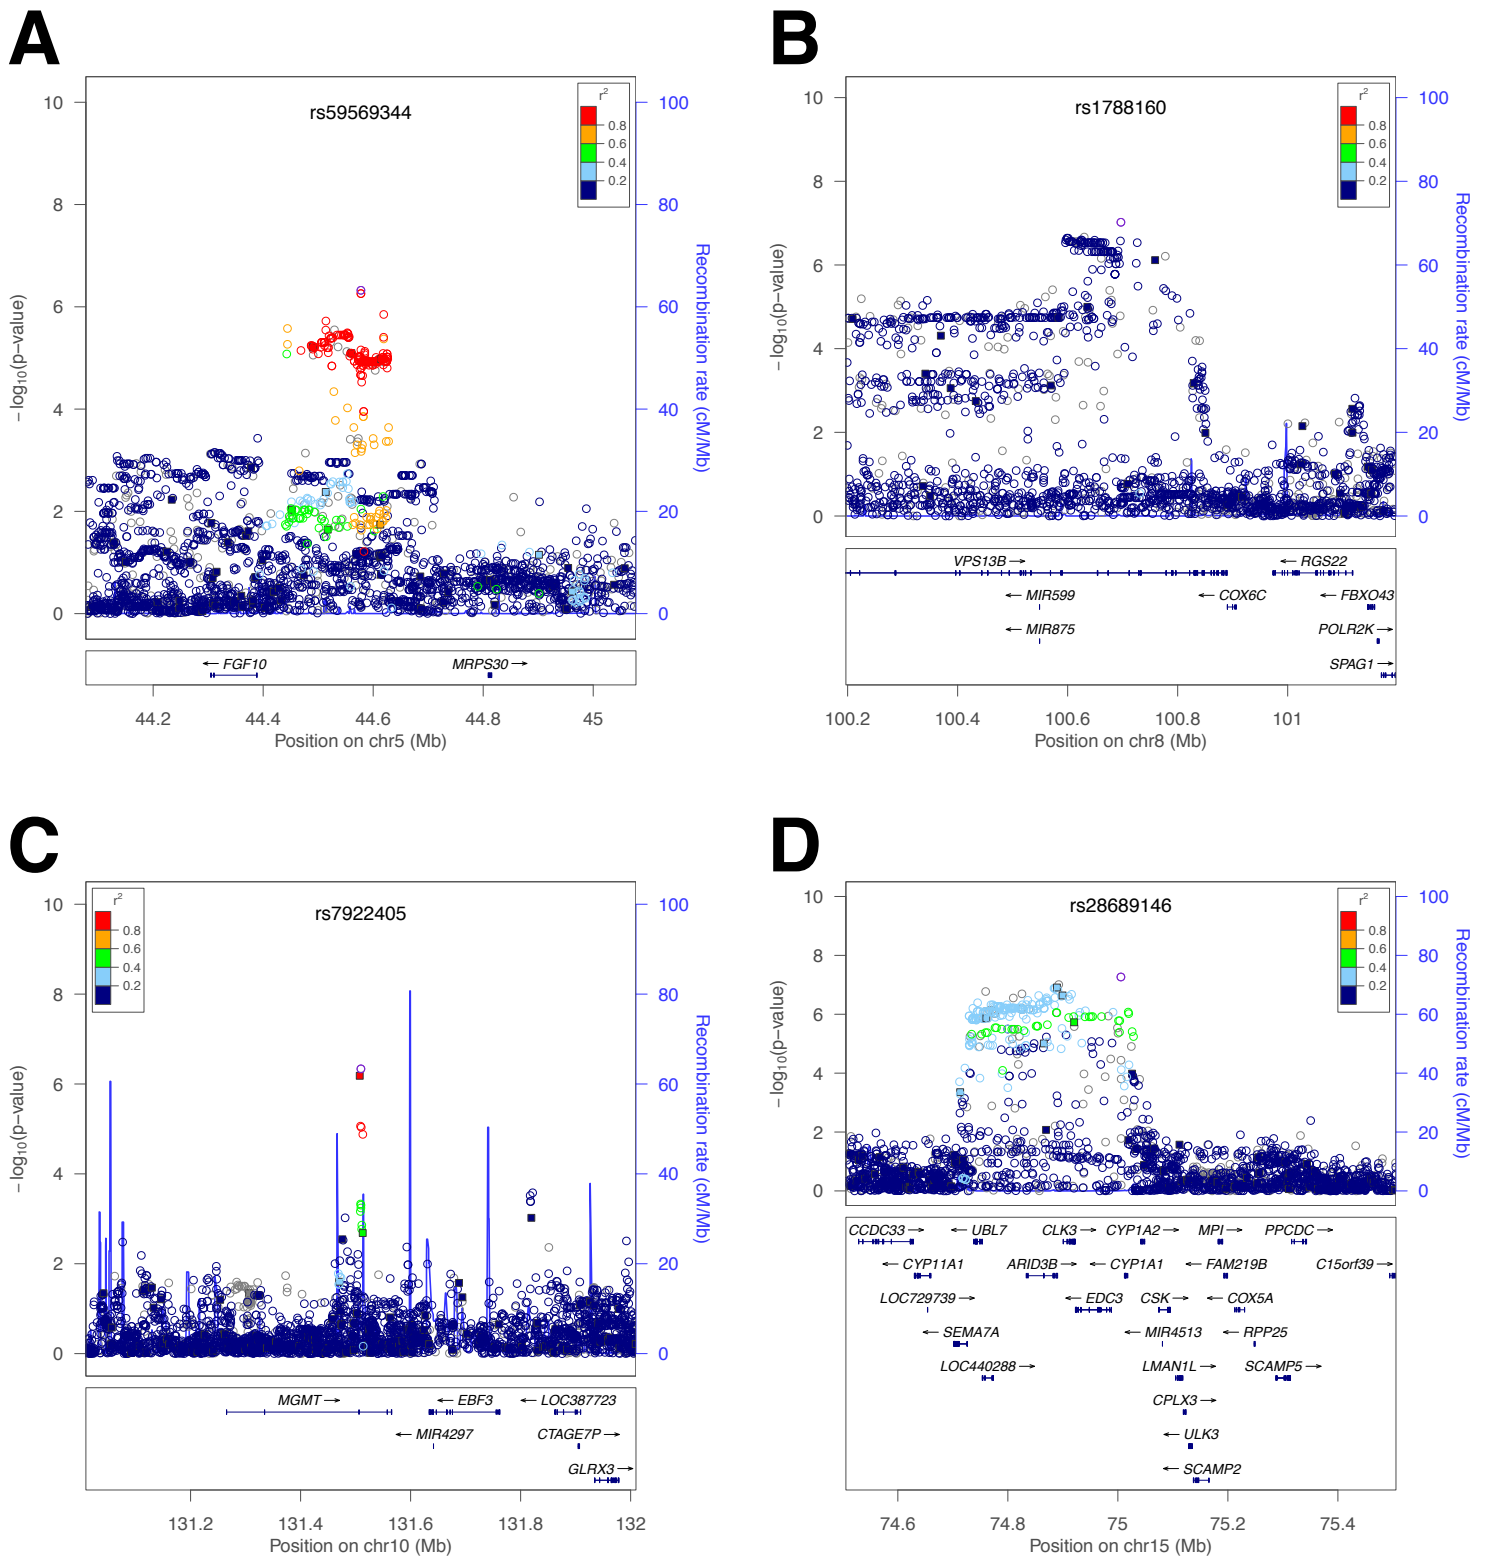

**Supplementary Figure 4. Novel loci approaching genome-wide significance in multiethnic meta-analysis.**

(A) 5p13 (B) 8q22 (C) 10q26 (D) 15q24. The lead SNP for each locus is colored purple. Genotyped SNPs are indicated by filled squares, imputed SNPs are open circles.

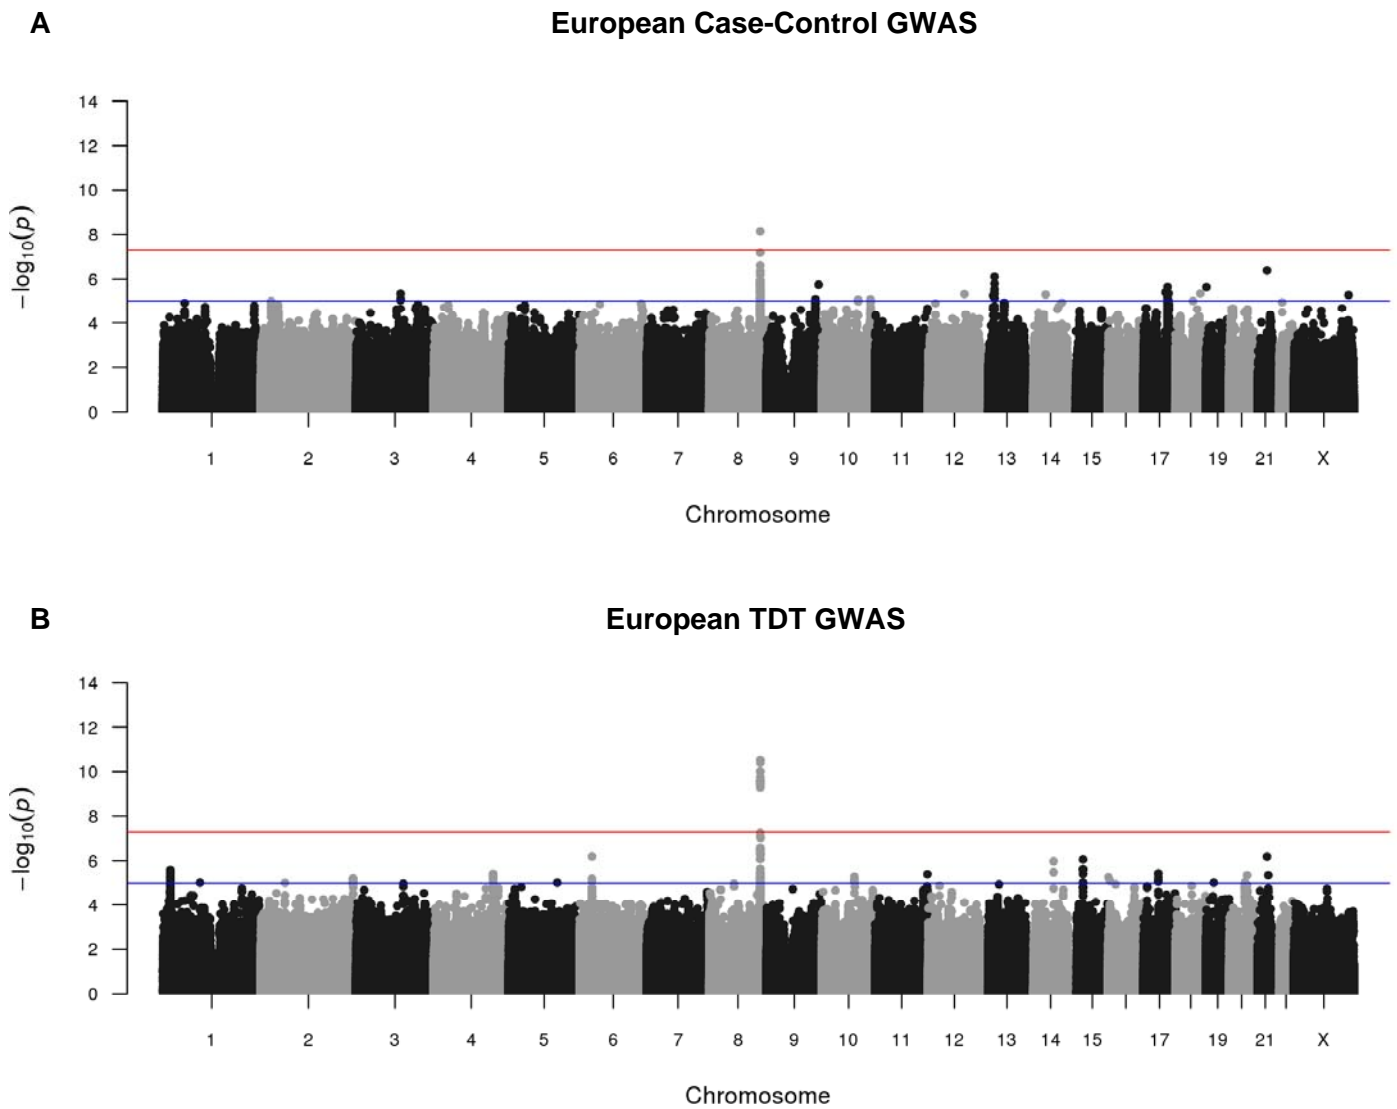

**Supplementary Figure 5. Manhattan plots for case-control and TDT analyses in the European subsample.** (A) Results for logistic regression analysis using 5 PCs of ancestry. Genomic inflation factor,  $\lambda$ , was 0.995. (B) Results for TDT analysis. Genomic inflation factor ( $\lambda$ ) was 1.041.

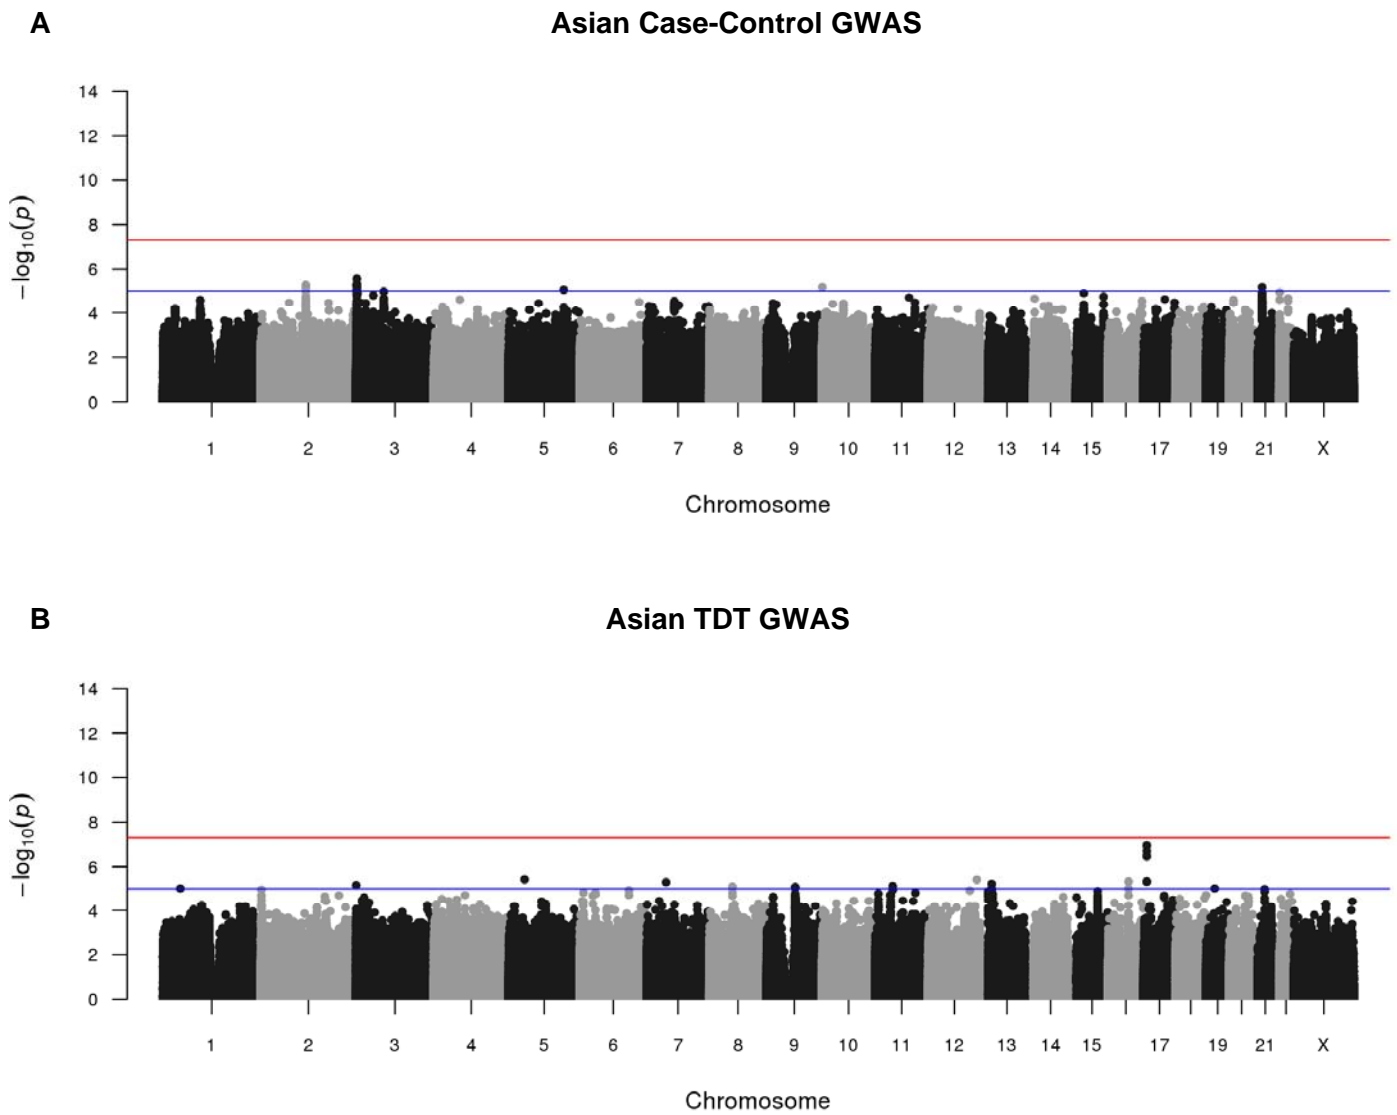

**Supplementary Figure 6. Manhattan plots for case-control and TDT analyses in the Asian subsample.** (A) Results for logistic regression analysis using 3 PCs of ancestry. Genomic inflation factor,  $\lambda$ , was 0.964. (B) Results for TDT analysis. Genomic inflation factor ( $\lambda$ ) was 1.039.



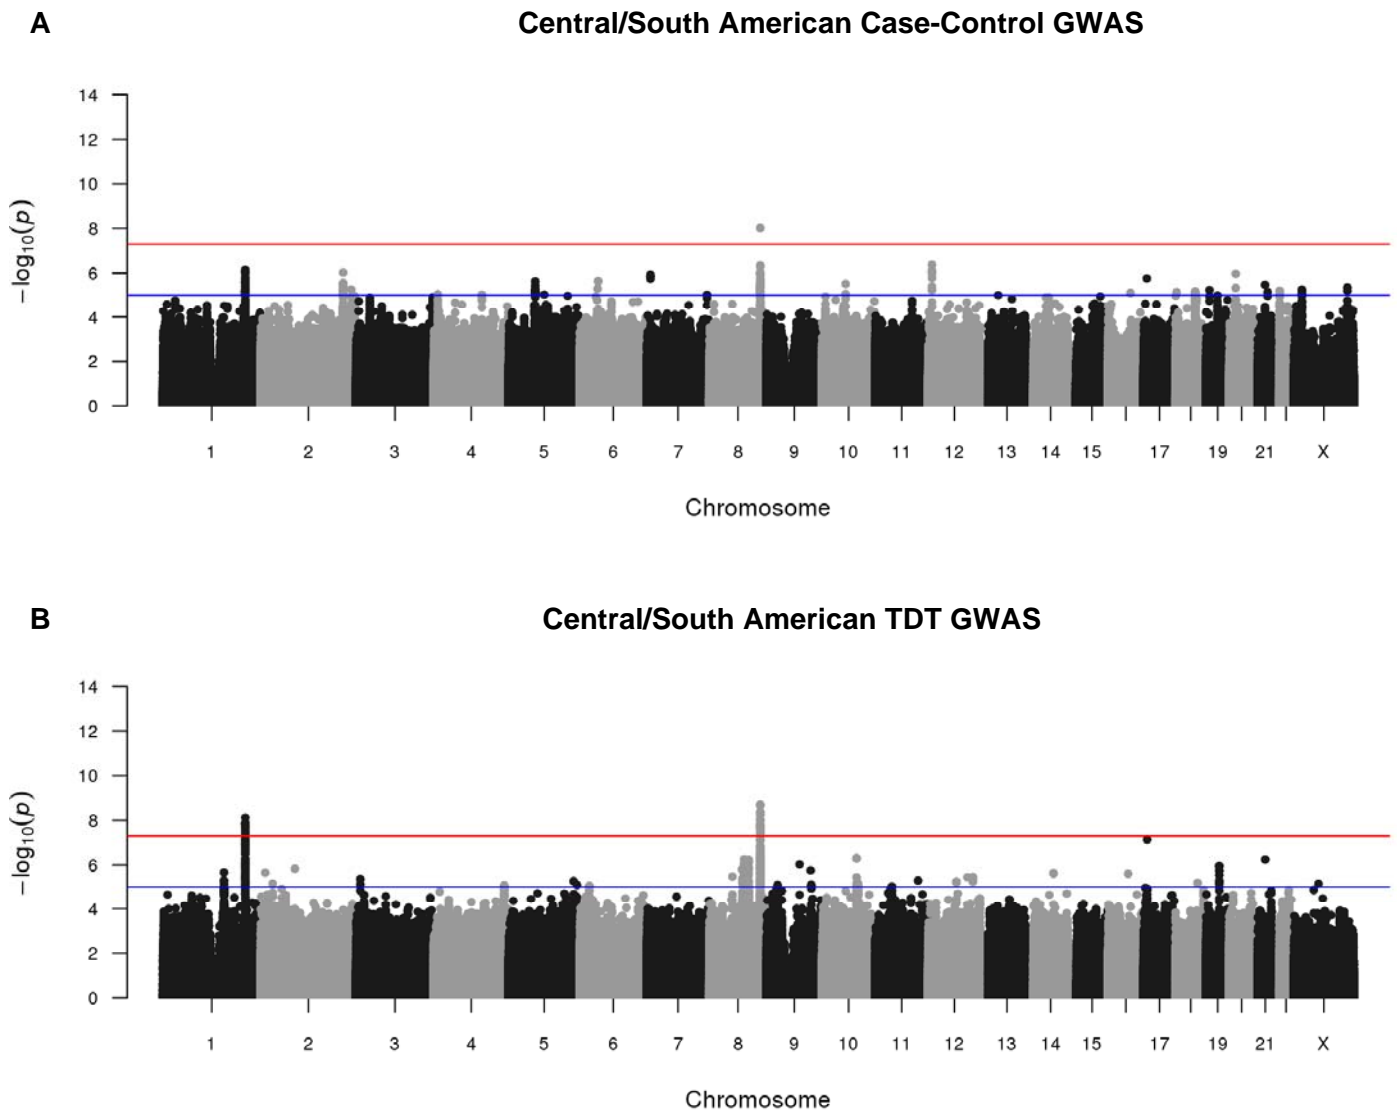

**Supplementary Figure 7. Manhattan plots for case-control and TDT analyses in the Central/South American subsample.** (A) Results for logistic regression analysis using 5 PCs of ancestry. Genomic inflation factor,  $\lambda$ , was 1.017. (B) Results for TDT analysis. Genomic inflation factor ( $\lambda$ ) was 1.049.

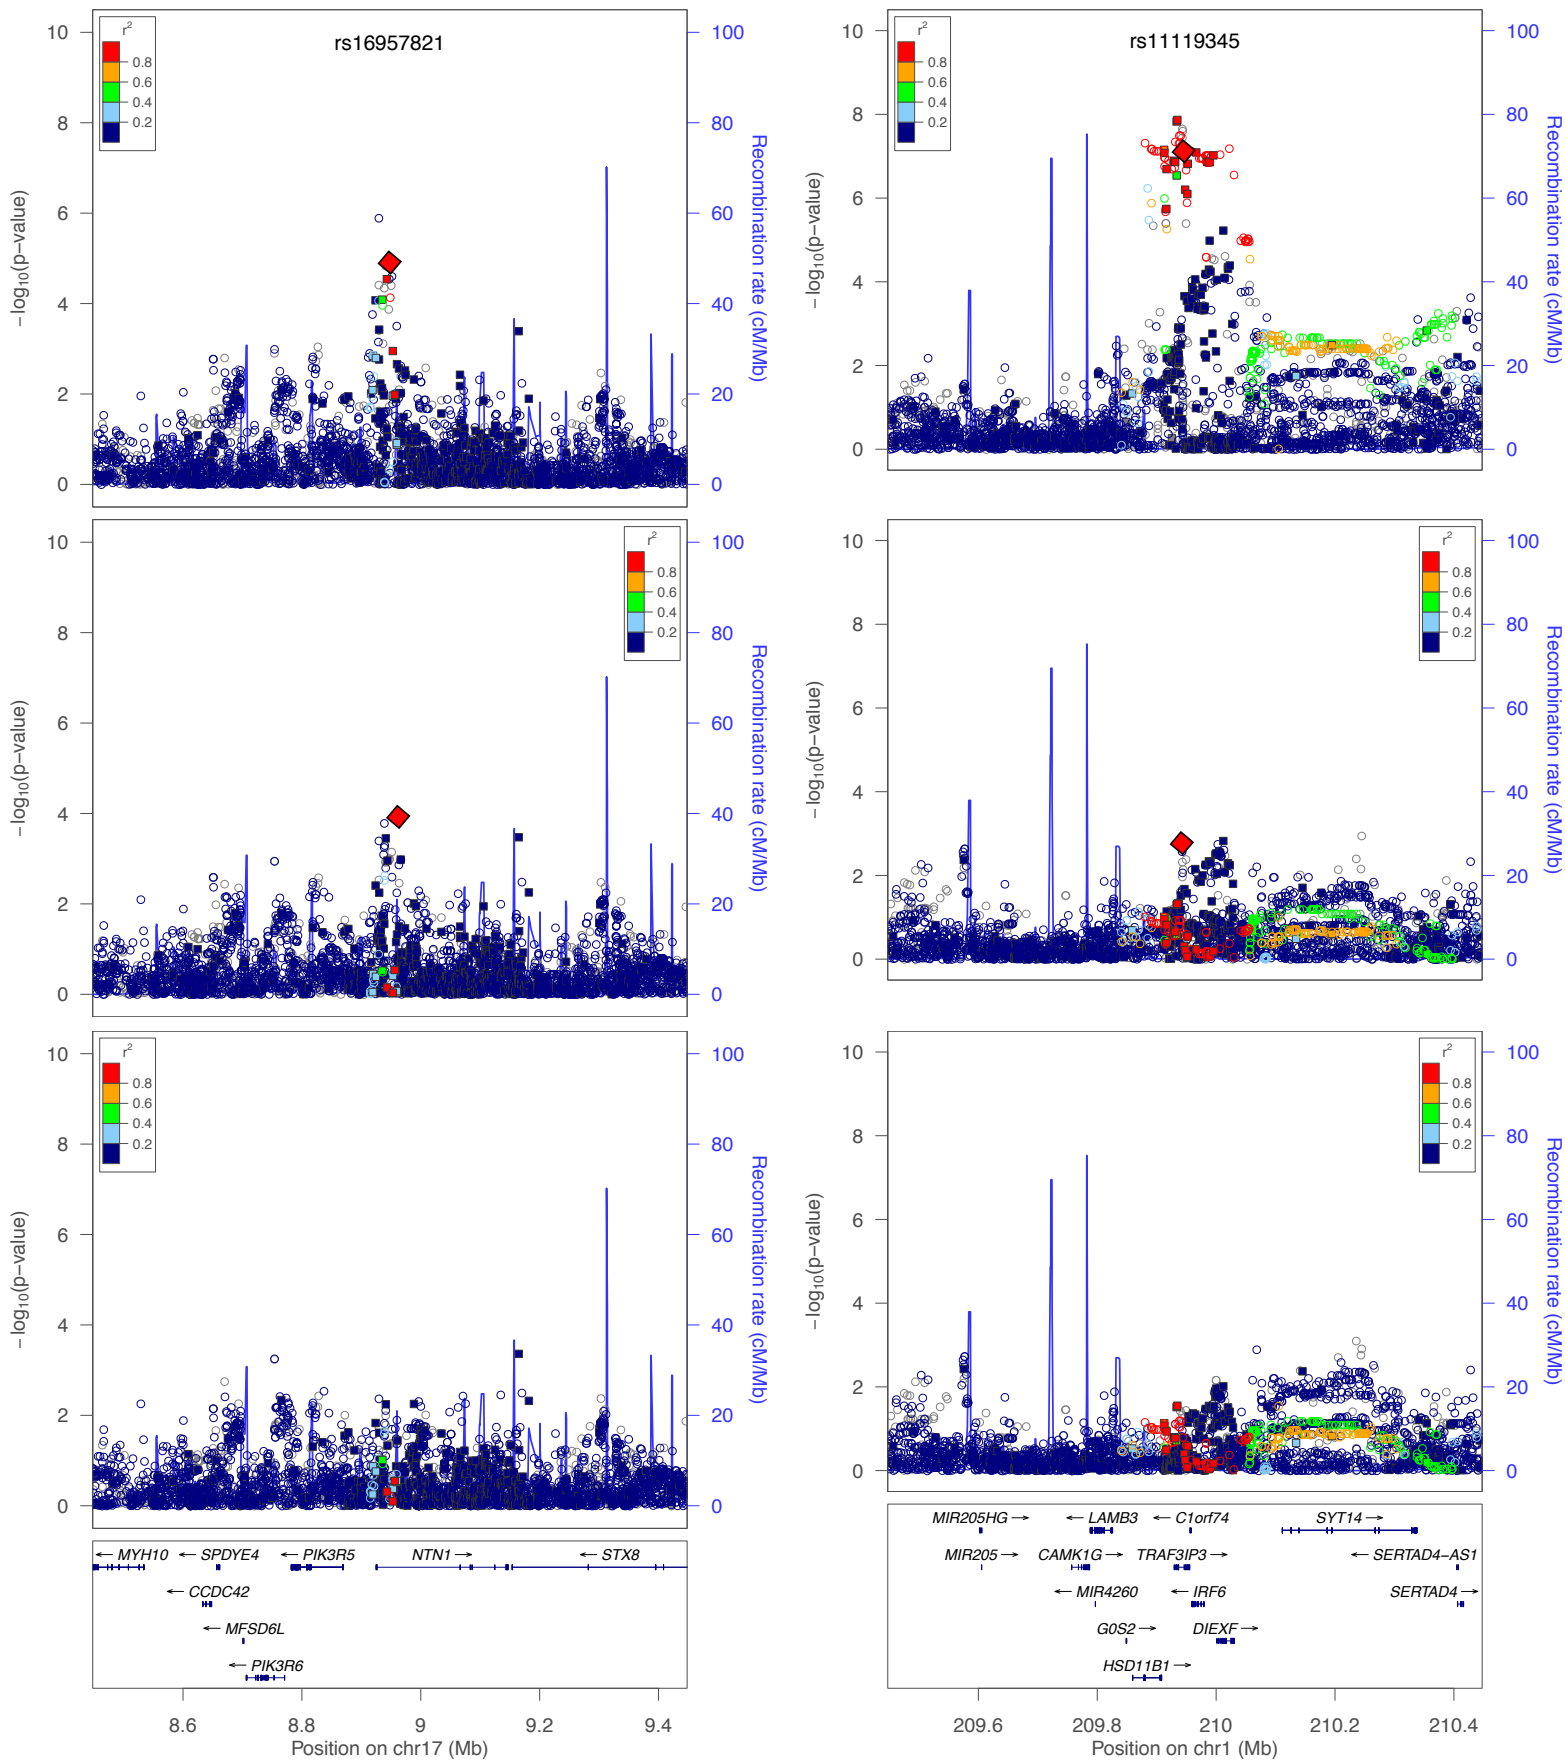

**Supplementary Figure 8. Conditional analysis at the 17p13 and 1q32 loci in multiethnic cases and controls.** (A) Stepwise conditional analysis in the 17p13 locus. (B) Stepwise conditional analysis in the 1q32 locus. The top panel shows the unconditioned results. The middle panel shows the results after conditioning on one of the lead SNPs (large red diamond). The bottom panel shows the results after conditioning on two SNPs.

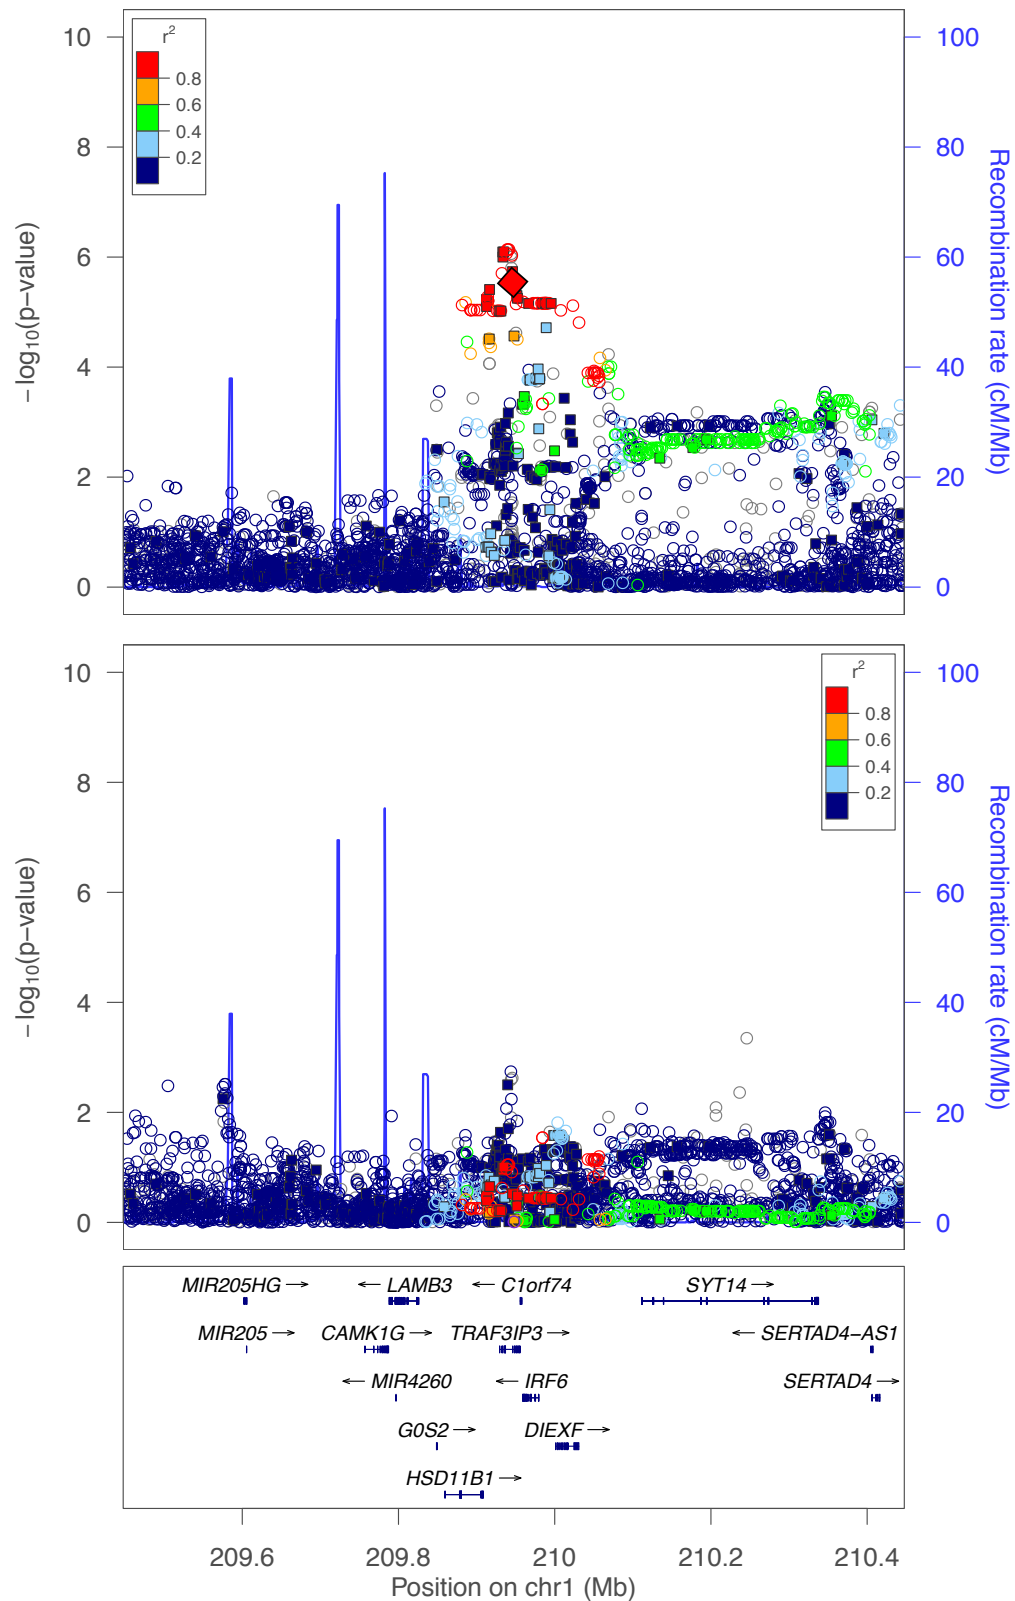

**Supplementary Figure 9. Conditional analysis at the 1q32 locus in Central/South American cases and controls.** The top panel shows the unconditioned results, the SNP that was conditioned on is rs11119345 (large red diamond). The bottom panel shows the results after conditioning.
